# Supplementary material
Source: MDPI journal article supplement (https://www.mdpi.com/1999-4907/14/9/1822)
Supplement: s1 [file s1]

**Supplementary Table S1.** Pairwise geographic distances (km) between the studied samples of *P. obovata*.

| <i>Po_Kr</i> | <i>Po_Ch</i> | <i>Po_Gn</i> | <i>Po_Br</i> | <i>Po_Kg</i> | <i>Po_Os</i> |              |
|--------------|--------------|--------------|--------------|--------------|--------------|--------------|
| 0,000        |              |              |              |              |              | <i>Po_Kr</i> |
| 72           | 0,000        |              |              |              |              | <i>Po_Ch</i> |
| 208          | 136          | 0,000        |              |              |              | <i>Po_Gn</i> |
| 119          | 128          | 212          | 0,000        |              |              | <i>Po_Br</i> |
| 279          | 248          | 226          | 175          | 0,000        |              | <i>Po-Kg</i> |
| 355          | 348          | 357          | 236          | 136          | 0,000        | <i>Po_Os</i> |

*Po\_Kr, Po\_Ch, Po\_Gn, Po\_Br, Po\_Kg, Po\_Os* - sample designations

**Supplementary Table S2.** Pairwise geographic distances (km) between the studied samples of *L. sibirica*.

| <i>Ls_Tl</i> | <i>Ls_Ih</i> | <i>Ls_Bn</i> | <i>Ls_Kr</i> | <i>Ls_Gn</i> | <i>Ls_Kh</i> |              |
|--------------|--------------|--------------|--------------|--------------|--------------|--------------|
| 0,000        |              |              |              |              |              | <i>Ls_Tl</i> |
| 14           | 0,000        |              |              |              |              | <i>Ls_Ih</i> |
| 188          | 174          | 0,000        |              |              |              | <i>Ls_Bn</i> |
| 142          | 131          | 68           | 0,000        |              |              | <i>Ls_Kr</i> |
| 319          | 305          | 132          | 192          | 0,000        |              | <i>Ls_Gn</i> |
| 260          | 260          | 275          | 215          | 361          | 0,000        | <i>Ls_Kr</i> |

*Ls\_Tl, Ls\_Ih, Ls\_Bn, Ls\_Kr, Ls\_Gn, Ls\_Kh* - sample designations

**Supplementary Table S3.** Morphological characterization of *P. obovata*, *P. abies* and *L. sibirica*.

| Trait / tree            | <i>Picea obovata</i> Ledeb. – siberian spruce                   | <i>Picea abies</i> (L.) Karst. – european spruce                         | <i>Larix sibirica</i> Ledeb – siberian larch                                  |
|-------------------------|-----------------------------------------------------------------|--------------------------------------------------------------------------|-------------------------------------------------------------------------------|
| Tree height, crown type | Up to 30 meters, crown narrow-conic                             | 30 to 50 meters, crown sharp conic                                       | Up to 45 meters, crown conic (young trees) to broad and irregular (old trees) |
| Bark                    | Gray, rimose                                                    | Reddish-brown to gray                                                    | Gray, thick, rimose                                                           |
| Needles                 | Linear awl-shaped tetraquetrous needles                         | Linear awl-shaped tetraquetrous needles                                  | Narrow, linear, soft needles                                                  |
| Young cones             | Purple-red, single, elongated ovoid, 13-20 mm long, 6-7 mm wide | Elongated cylindric, bright red to green                                 | Pink to red, 8-12 mm long                                                     |
| Mature cones            | Brown, elongated ovoid, 5-8 cm long.                            | Brown, elongated cylindric, 10-16 cm long, 3-4 cm wide                   | Brown to gray-black, 2-3 cm long                                              |
| Seeds                   | Dark brown, obovoid, 4 mm long, 2.5 mm wide, wing 10-13 mm long | Dark brown, ovoid, sharp-pointed, 4 mm long, wing yellow-red, 12 mm long | Dark brown, ovoid, 2 mm long, wing yellow-brown                               |

**Supplementary Table S4.** Characterization of DNA fragments of 6 populations of *P. obovata*.

| ISSR primer ID    | Fragments (bp) | Number and frequency of polymorphic DNA fragments in populations |               |               |               |               |               | Total |               |
|-------------------|----------------|------------------------------------------------------------------|---------------|---------------|---------------|---------------|---------------|-------|---------------|
|                   |                | <i>Po_Kr</i>                                                     | <i>Po_Ch</i>  | <i>Po_Gn</i>  | <i>Po_Br</i>  | <i>Po_Kg</i>  | <i>Po_Os</i>  | N     | P             |
| M1 (AC)8CG        | 200-1690       | 20<br>(0,833)                                                    | 16<br>(0,800) | 16<br>(0,889) | 17<br>(0,895) | 16<br>(0,889) | 18<br>(0,783) | 30    | 24<br>(0,800) |
| CR-212 (CT)8TG    | 230-1300       | 14<br>(0,933)                                                    | 23<br>(0,885) | 13<br>(0,765) | 21<br>(0,913) | 10<br>(0,769) | 4<br>(0,571)  | 29    | 25<br>(0,862) |
| CR-215 (CA)6GT    | 160-1430       | 9<br>(0,750)                                                     | 12<br>(0,706) | 15<br>(0,681) | 13<br>(0,650) | 14<br>(0,700) | 17<br>(0,810) | 25    | 19<br>(0,760) |
| X10 (AGC)6C       | 250-1300       | 5<br>(0,556)                                                     | 7<br>(0,700)  | 5<br>(0,714)  | 5<br>(0,500)  | 1<br>(0,200)  | 1<br>(0,250)  | 15    | 9<br>(0,600)  |
| X9 (ACC)6G        | 370-3000       | 6<br>(0,500)                                                     | 7<br>(0,538)  | 9<br>(0,750)  | 4<br>(0,364)  | 7<br>(0,700)  | 4<br>(0,571)  | 16    | 12<br>(0,750) |
| Total (frequency) |                | 54<br>(0,750)                                                    | 65<br>(0,756) | 58<br>(0,763) | 60<br>(0,723) | 48<br>(0,727) | 44<br>(0,710) | 115   | 89<br>(0,774) |

Designation of *P. obovata* populations: *Po\_Gn*, Gainy's forestry; *Po\_Kr*, Krasnovishersk's forestry; *Po\_Ch* – Cherdyn's forestry; *Po\_Br* – Berezniki's forestry, *Po\_Kg* – Sivin's forestry, *Po\_Os* – Kungur's forestry; N is the total number of DNA fragments, and P is the number of polymorphic DNA fragments; frequencies are indicated in brackets.

**Supplementary Table S5.** Characterization of DNA fragments of 6 populations of *L. sibirica*.

| ISSR primer ID    | Fragments (bp) | Number and frequency of polymorphic DNA fragments in populations |               |               |               |               |               | Total |                |
|-------------------|----------------|------------------------------------------------------------------|---------------|---------------|---------------|---------------|---------------|-------|----------------|
|                   |                | <i>Ls_Ih</i>                                                     | <i>Ls_Tl</i>  | <i>Ls_Bn</i>  | <i>Ls_Kr</i>  | <i>Ls_Gn</i>  | <i>Ls_Kh</i>  | N     | P              |
| M3<br>(AC)8CT     | 220 - 900      | 18<br>(0,783)                                                    | 15<br>(0,789) | 15<br>(0,833) | 14<br>(0,737) | 14<br>(0,737) | 17<br>(0,809) | 24    | 21<br>(0,875)  |
| X11<br>(AGC)6G    | 220 - 1370     | 21<br>(0,913)                                                    | 29<br>(0,967) | 31<br>(0,969) | 27<br>(0,900) | 31<br>(0,969) | 20<br>(0,869) | 34    | 31<br>(0,912)  |
| CR-215<br>(CA)6GT | 200 - 1000     | 12<br>(0,705)                                                    | 5<br>(0,454)  | 7<br>(0,636)  | 6<br>(0,500)  | 13<br>(0,722) | 11<br>(0,733) | 18    | 15<br>(0,833)  |
| X10<br>(AGC)6C    | 230 - 1200     | 13<br>(0,765)                                                    | 16<br>(0,762) | 19<br>(0,950) | 17<br>(0,850) | 11<br>(0,733) | 11<br>(0,647) | 23    | 21<br>(0,913)  |
| ISSR8<br>(GAG)6C  | 210 - 600      | 8<br>(0,727)                                                     | 9<br>(0,750)  | 7<br>(0,700)  | 8<br>(0,667)  | 10<br>(0,769) | 7<br>(0,636)  | 15    | 13<br>(0,867)  |
| Total (frequency) |                | 72<br>(0,791)                                                    | 74<br>(0,796) | 79<br>(0,868) | 72<br>(0,774) | 79<br>(0,814) | 66<br>(0,759) | 114   | 101<br>(0,886) |

Designation of *L. sibirica* populations in the Perm Krai: *Ls\_Tl* and *Ls\_Ih*— Vishersky Reserve, *Ls\_Bn*— Cherdyn's forestry, *Ls\_Kr*— Krasnovishersk's forestry, *Ls\_Gn*— Gainy's forestry; in the Sverdlovsk Region *Ls\_Kh* - Karpinsk's forestry; N is the total number of DNA fragments, and P is the number of polymorphic DNA fragments; frequencies are indicated in brackets.

**Supplementary Table S6.** Calculation of the genetic originality coefficient (GOC) on the example of 6 populations of *P. obovata* based on the polymorphism of ISSR markers.

| Initial matrix of presence/absence of ISSR fragments in 6 populations |              |              |              |              |              |             | “Weighted” values of the presence/absence of ISSR fragments based on the frequency of occurrence in the sample |              |              |              |             |                  |             | $\Sigma$ | GOC=<br>$\Sigma/N$ |
|-----------------------------------------------------------------------|--------------|--------------|--------------|--------------|--------------|-------------|----------------------------------------------------------------------------------------------------------------|--------------|--------------|--------------|-------------|------------------|-------------|----------|--------------------|
| Pop.                                                                  | X10_<br>1300 | X10_<br>1200 | X10_<br>1100 | X10_<br>1000 | X10_<br>_900 | X10_<br>800 | Pop.                                                                                                           | X10_<br>1300 | X10_<br>1200 | X10_<br>1100 | X10_<br>_00 | X10_<br>_90<br>0 | X10_<br>800 |          |                    |
| <i>Po_Gn</i>                                                          | 1            | 0            | 1            | 0            | 0            | 1           | <i>Po_Gn</i>                                                                                                   | 1            | 0.2          | 0.2          | 0.2         | 1                | 0.5         | 57,1     | 0,5540             |
| <i>Po_Ch</i>                                                          | 1            | 0            | 0            | 0            | 1            | 1           | <i>Po_Ch</i>                                                                                                   | 1            | 0.2          | 5            | 0.2         | 1                | 0.5         | 69,7     | 0,6763             |
| <i>Po_Kr</i>                                                          | 0            | 0            | 1            | 1            | 1            | 0           | <i>Po_Kr</i>                                                                                                   | 1            | 0.2          | 0.2          | 5           | 1                | 2           | 91,3     | 0,8860             |
| <i>Po_Br</i>                                                          | 1            | 1            | 1            | 0            | 1            | 0           | <i>Po_Br</i>                                                                                                   | 1            | 5            | 0.2          | 0.2         | 1                | 2           | 81,1     | 0,7870             |
| <i>Po_Kg</i>                                                          | 0            | 0            | 1            | 0            | 0            | 1           | <i>Po_Kg</i>                                                                                                   | 1            | 0.2          | 0.2          | 0.2         | 1                | 0.5         | 88,3     | 0,8569             |
| <i>Po_Os</i>                                                          | 0            | 0            | 1            | 0            | 0            | 1           | <i>Po_Os</i>                                                                                                   | 1            | 0.2          | 0.2          | 0.2         | 1                | 0.5         | 105,7    | 1,0258             |
| Quantity<br>"1"                                                       | 3            | 1            | 5            | 1            | 3            | 4           | Quantity<br>"1"                                                                                                | 3            | 1            | 5            | 1           | 3                | 4           |          |                    |
| Quantity<br>"0"                                                       | 3            | 5            | 1            | 5            | 3            | 2           | Quantity<br>"0"                                                                                                | 3            | 5            | 1            | 5           | 3                | 2           |          |                    |
| "Weight"<br>"1"                                                       | 1            | 5            | 0.2          | 5            | 1            | 0.5         | "Weight"<br>"1"                                                                                                | 1            | 5            | 0.2          | 5           | 1                | 0.5         |          |                    |
| "Weight"<br>"0"                                                       | 1            | 0.2          | 5            | 0.2          | 1            | 2           | "Weight"<br>"0"                                                                                                | 1            | 0.2          | 5            | 0.2         | 1                | 2           |          |                    |

Note:  $\Sigma$  is the sum of the "weights" of all ISSR fragments for each population,  $GOC=\Sigma/N$  is the coefficient of genetic originality of the population as a quotient of the obtained sum and the number of analyzed ISSR fragments of each population (n=103).

**Supplementary Table S7.** Calculation of the genetic originality coefficient (GOC) on the example of 6 populations of *L. sibirica* based on the polymorphism of ISSR markers.

| Initial matrix of presence/absence of ISSR fragments in 6 populations |            |            |            |            |            |            | “Weighted” values of the presence/absence of ISSR fragments based on the frequency of occurrence in the sample |            |            |            |            |            |            | $\Sigma$ | GOC=<br>$\Sigma/N$ |
|-----------------------------------------------------------------------|------------|------------|------------|------------|------------|------------|----------------------------------------------------------------------------------------------------------------|------------|------------|------------|------------|------------|------------|----------|--------------------|
| Pop.                                                                  | M3_9<br>00 | M3_8<br>50 | M3_<br>820 | M3_6<br>60 | M3_<br>650 | M3_6<br>20 | Pop.                                                                                                           | M3_9<br>00 | M3_8<br>50 | M3_<br>820 | M3_66<br>0 | M3_65<br>0 | M3_6<br>20 |          |                    |
| <i>Ls_Tl</i>                                                          | 1          | 1          | 1          | 1          | 1          | 1          | <i>Ls_Tl</i>                                                                                                   | 0.2        | 1          | 1          | 1          | 0.2        | 1          | 60,4     | 0,5749             |
| <i>Ls_Ih</i>                                                          | 1          | 1          | 1          | 1          | 1          | 1          | <i>Ls_Ih</i>                                                                                                   | 0.2        | 1          | 1          | 1          | 0.2        | 1          | 58,6     | 0,5577             |
| <i>Ls_Kr</i>                                                          | 1          | 0          | 0          | 0          | 0          | 0          | <i>Ls_Kr</i>                                                                                                   | 0.2        | 1          | 1          | 1          | 5          | 1          | 45,4     | 0,4320             |
| <i>Ls_Bn</i>                                                          | 1          | 0          | 0          | 0          | 1          | 0          | <i>Ls_Bn</i>                                                                                                   | 0.2        | 1          | 1          | 1          | 0.2        | 1          | 39,1     | 0,3720             |
| <i>Ls_Gn</i>                                                          | 1          | 0          | 0          | 0          | 1          | 0          | <i>Ls_Gn</i>                                                                                                   | 0.2        | 1          | 1          | 1          | 0.2        | 1          | 69,4     | 0,6606             |
| <i>Ls_Kh</i>                                                          | 0          | 1          | 1          | 1          | 1          | 1          | <i>Ls_Kh</i>                                                                                                   | 5          | 1          | 1          | 1          | 0.2        | 1          | 82,3     | 0,7834             |
| Quantity<br>"1"                                                       | 5          | 3          | 3          | 3          | 5          | 3          | Quantity<br>"1"                                                                                                | 5          | 3          | 3          | 3          | 5          | 3          |          |                    |
| Quantity<br>"0"                                                       | 1          | 3          | 3          | 3          | 1          | 3          | Quantity<br>"0"                                                                                                | 1          | 3          | 3          | 3          | 1          | 3          |          |                    |
| "Weight"<br>"1"                                                       | 0.2        | 1          | 1          | 1          | 0.2        | 1          | "Weight"<br>"1"                                                                                                | 0.2        | 1          | 1          | 1          | 0.2        | 1          |          |                    |
| "Weight"<br>"0"                                                       | 5          | 1          | 1          | 1          | 5          | 1          | "Weight"<br>"0"                                                                                                | 5          | 1          | 1          | 1          | 5          | 1          |          |                    |

Note:  $\Sigma$  is the sum of the "weights" of all ISSR fragments for each population,  $GOC=\Sigma/N$  is the coefficient of genetic originality of the population as a quotient of the obtained sum and the number of analyzed ISSR fragments of each population (n=105).

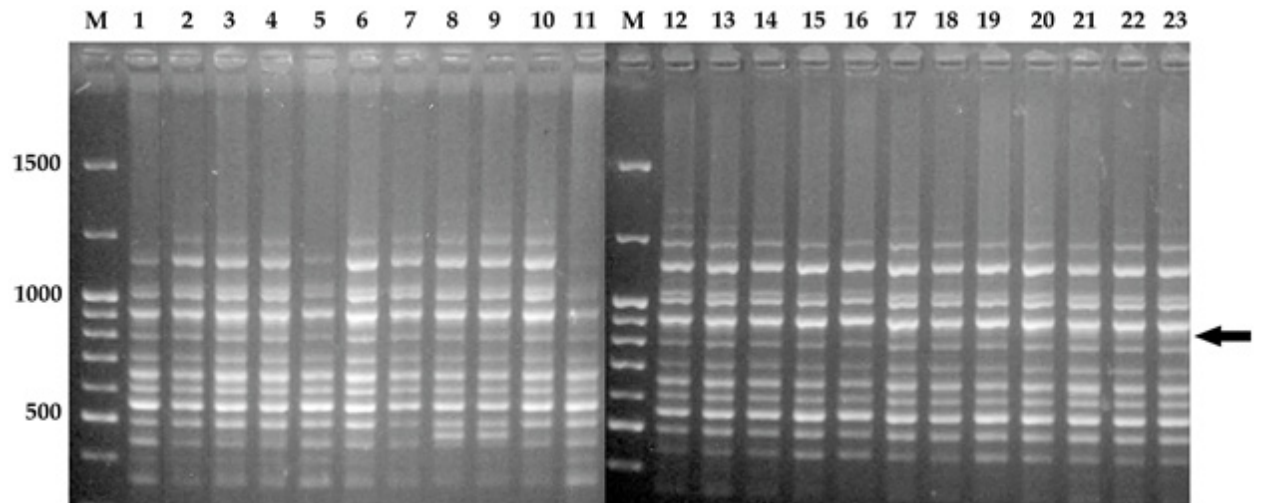

**Supplementary Figure S1.** The band profiles with ISSR primer X9 (ACC)<sub>6</sub>G for the samples of *P.obovata* from the populations of Gainy's forestry (*Po\_Gn*). The numbers on the top indicate the sample numbers (1-23). Size marker (M): 100 bp DNA Ladder, marked on the left in bp (300 bp to 1500 bp).

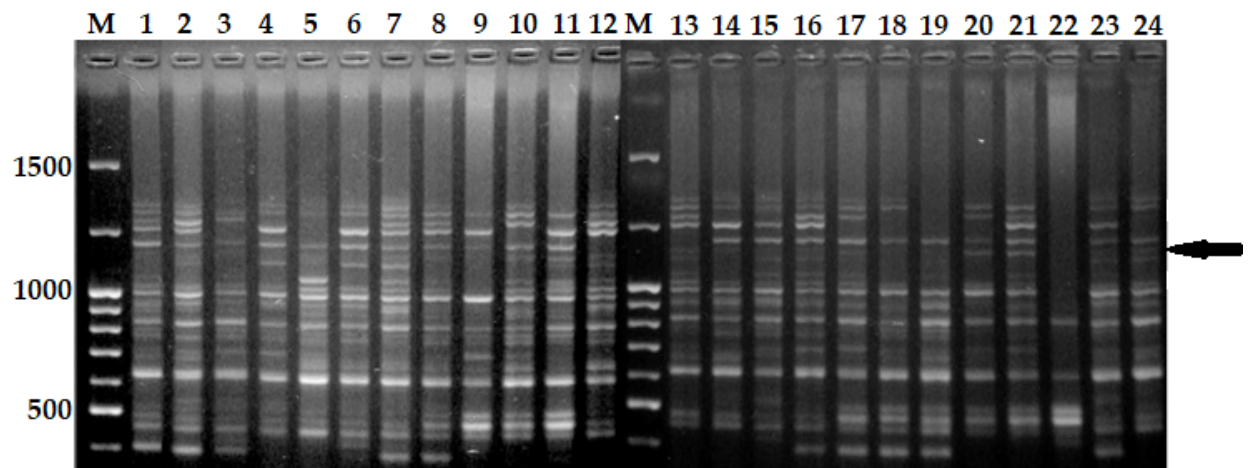

**Supplementary Figure S2.** The band profiles with ISSR primer M1 (AC)<sub>8</sub>CG for the samples of *P.obovata* from the populations of Krasnovishersk's forestry (*Po\_Kr*). The numbers on the top indicate the sample numbers (1-24). Size marker (M): 100 bp DNA Ladder, marked on the left in bp (400 bp to 1500 bp).

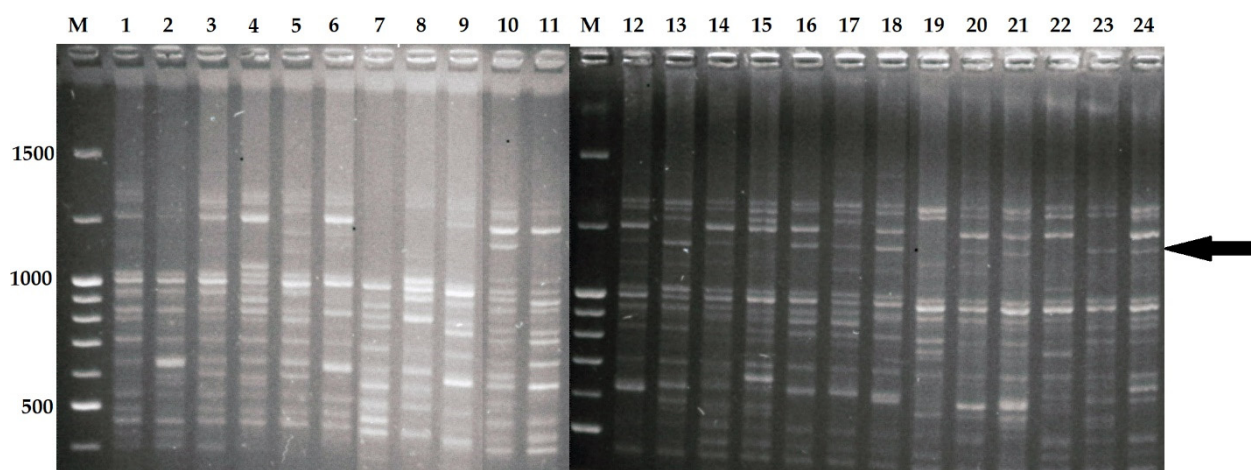

**Supplementary Figure S3.** The band profiles with ISSR primer M1 (AC)<sub>8</sub>CG for the samples of *P.obovata* from the populations of Gainy's forestry (*Po\_Gn*). The numbers on the top indicate the sample numbers (1-24). Size marker (M): 100 bp DNA Ladder, marked on the left in bp (400 bp to 1500 bp).

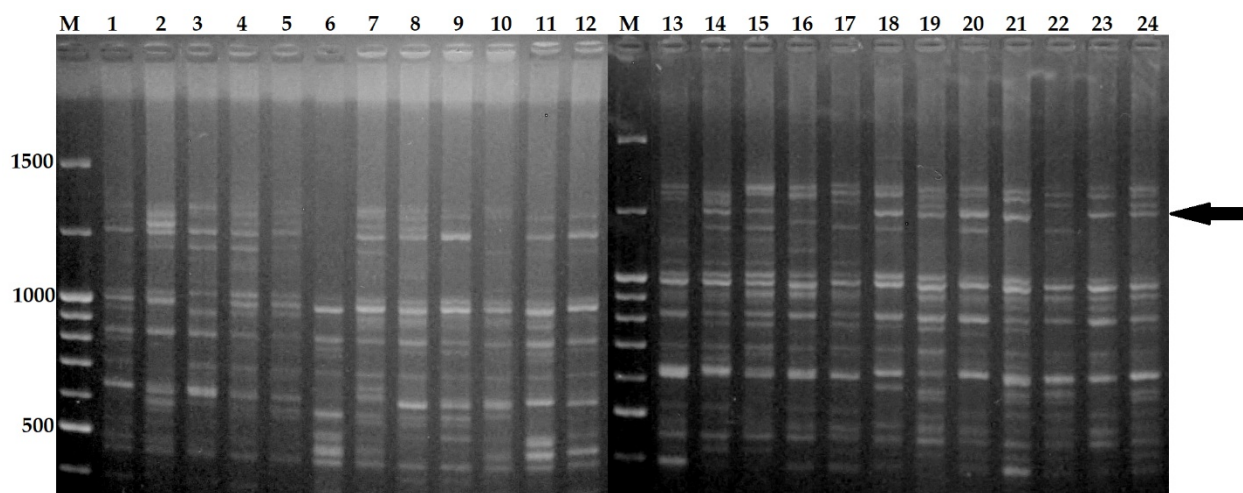

**Supplementary Figure S4.** The band profiles with ISSR primer M1 (AC)<sub>8</sub>CG for the samples of *P.obovata* from the populations of Cherdyn's forestry (*Po\_Ch*). The numbers on the top indicate the sample numbers (1-24). Size marker (M): 100 bp DNA Ladder, marked on the left in bp (400 bp to 1500 bp).



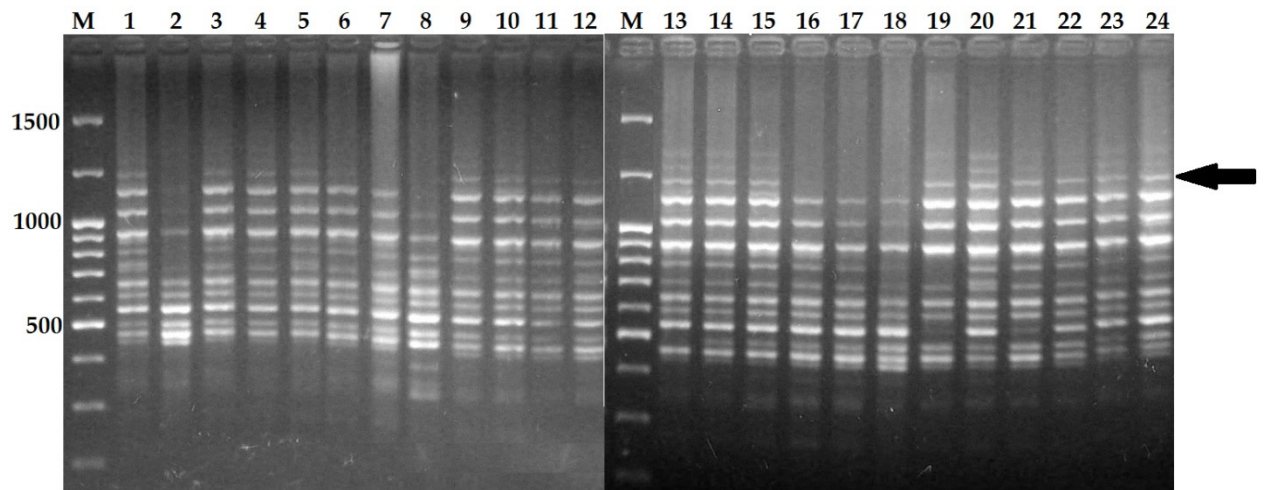

**Supplementary Figure S5.** The band profiles with ISSR primer X9 (ACC)6G for the samples of *P.obovata* from the populations of Cherdyn's forestry (*Po\_Ch*). The numbers on the top indicate the sample numbers (1-24). Size marker (M): 100 bp DNA Ladder, marked on the left in bp (300 bp to 1500 bp).

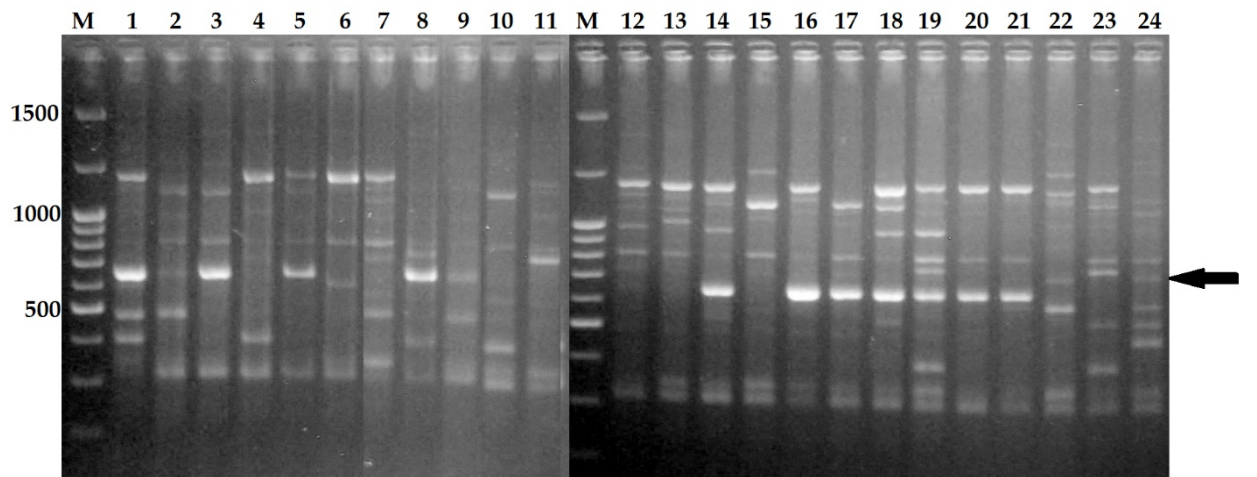

**Supplementary Figure S6.** The band profiles with ISSR primer X9 (ACC)6G for the samples of *P.obovata* from the populations of Krasnovishersk's forestry (*Po\_Kr*). The numbers on the top indicate the sample numbers (1-24). Size marker (M): 100 bp DNA Ladder, marked on the left in bp (300 bp to 1500 bp).

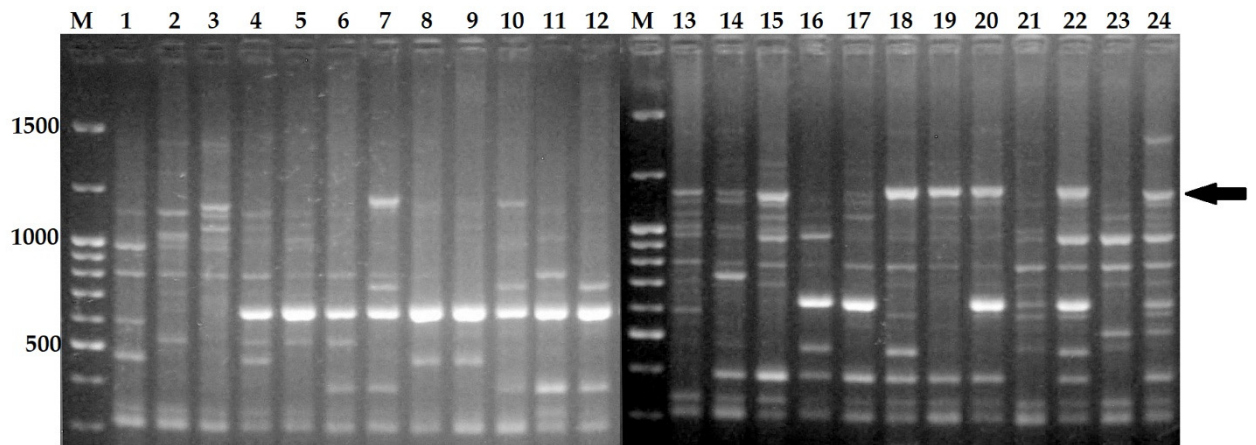

**Supplementary Figure S7.** The band profiles with ISSR primer X9 (ACC)6G for the samples of *P.obovata* from the populations of Karagai's forestry (*Po\_Kg*). The numbers on the top indicate the sample numbers (1-24). Size marker (M): 100 bp DNA Ladder, marked on the left in bp (300 bp to 1500 bp).

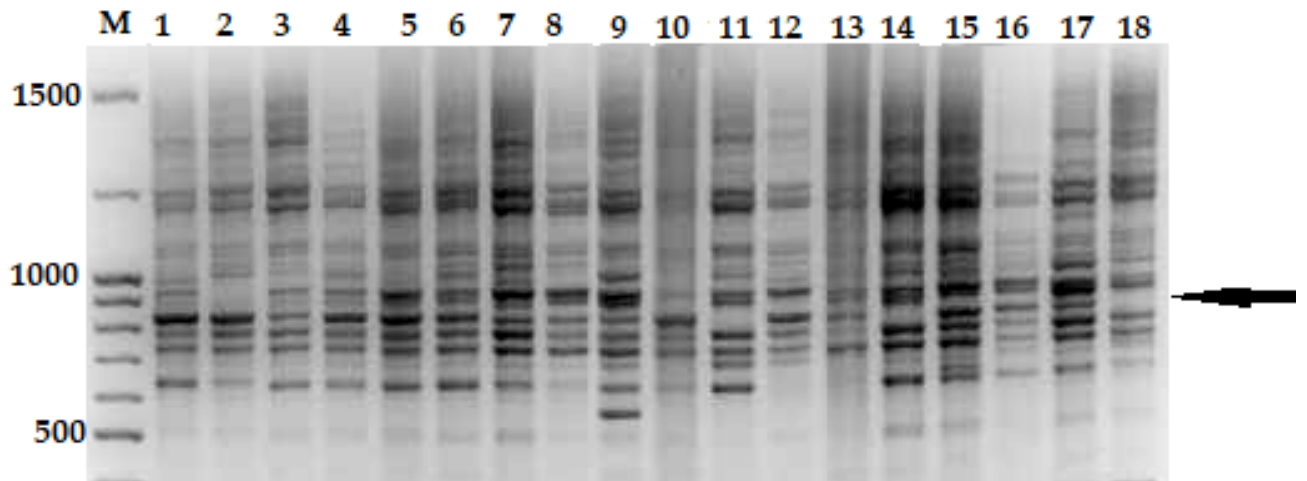

**Supplementary Figure S8.** The band profiles with ISSR primer X9 (ACC)6G for the samples of *P.obovata* from the populations of Berezniki's forestry (*Po\_Br*). The numbers on the top indicate the sample numbers (1-18). Size marker (M): 100 bp DNA Ladder, marked on the left in bp (300 bp to 1500 bp).

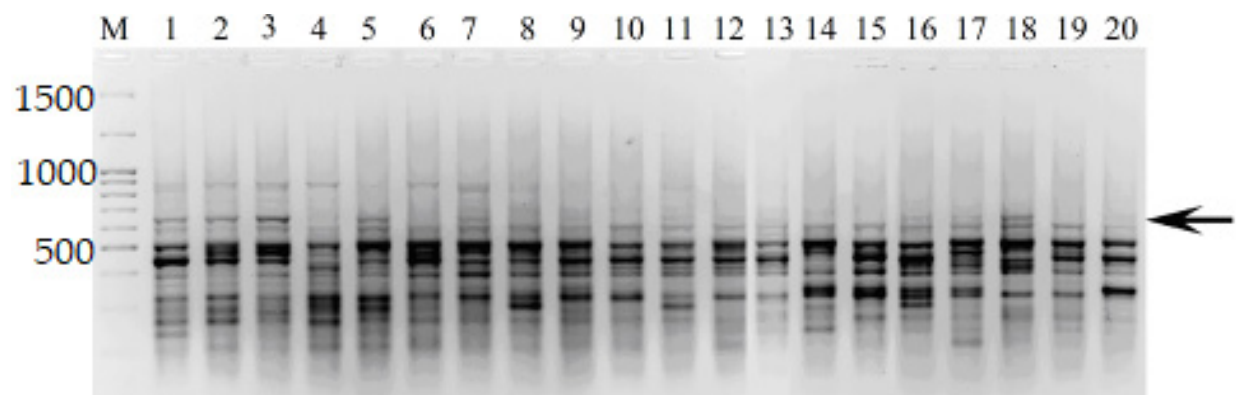

**Supplementary Figure S9.** The band profiles with ISSR primer M3 (AC)8CT for the samples of *L. sibirica* from the populations of Gainy's forestry (*Ls\_Gn*). The numbers on the top indicate the sample numbers (1-20). Size marker (M): 100 bp DNA Ladder, marked on the left in bp (300 bp to 1500 bp).

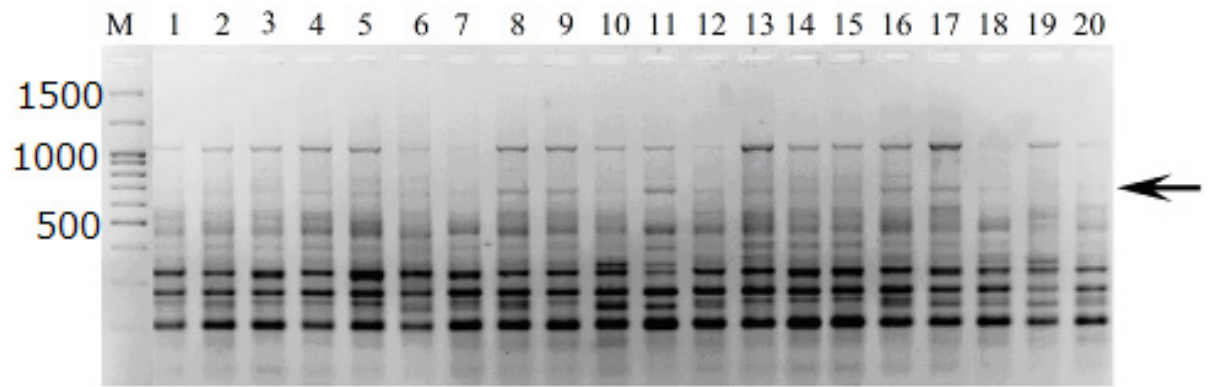

**Supplementary Figure S10.** The band profiles with ISSR primer CR-215 (CA)<sub>6</sub>GT for the samples of *L. sibirica* from the populations of Cherdyn's forestry (*Ls\_Bn*). The numbers on the top indicate the sample numbers (1-20). Size marker (M): 100 bp DNA Ladder, marked on the left in bp (300 bp to 1500 bp).

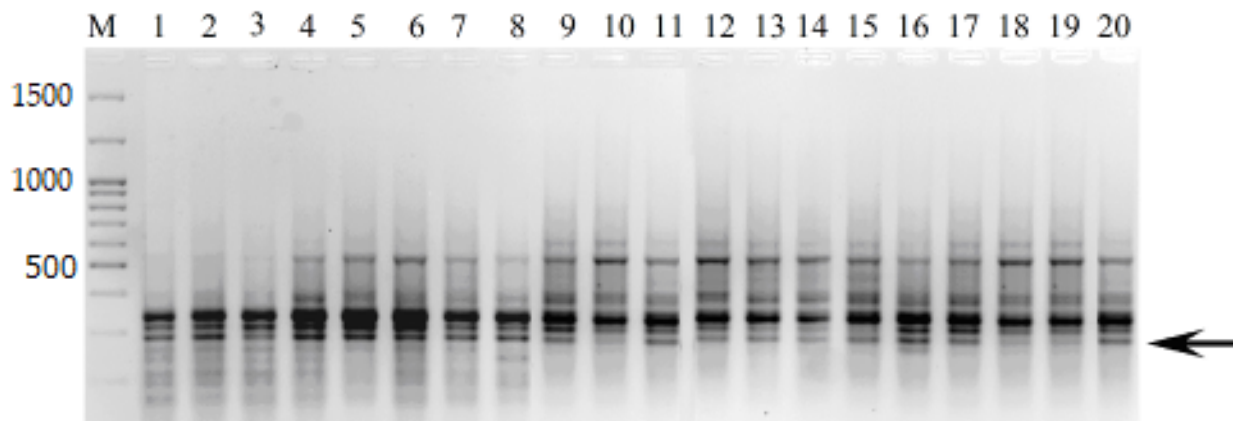

**Supplementary Figure S11.** The band profiles with ISSR primer ISSR8 (GAG)<sub>6</sub>C for the samples of *L. sibirica* from the populations of Krasnovishersk's forestry (*Ls\_Kr*). The numbers on the top indicate the sample numbers (1-20). Size marker (M): 100 bp DNA Ladder, marked on the left in bp (300 bp to 1500 bp).

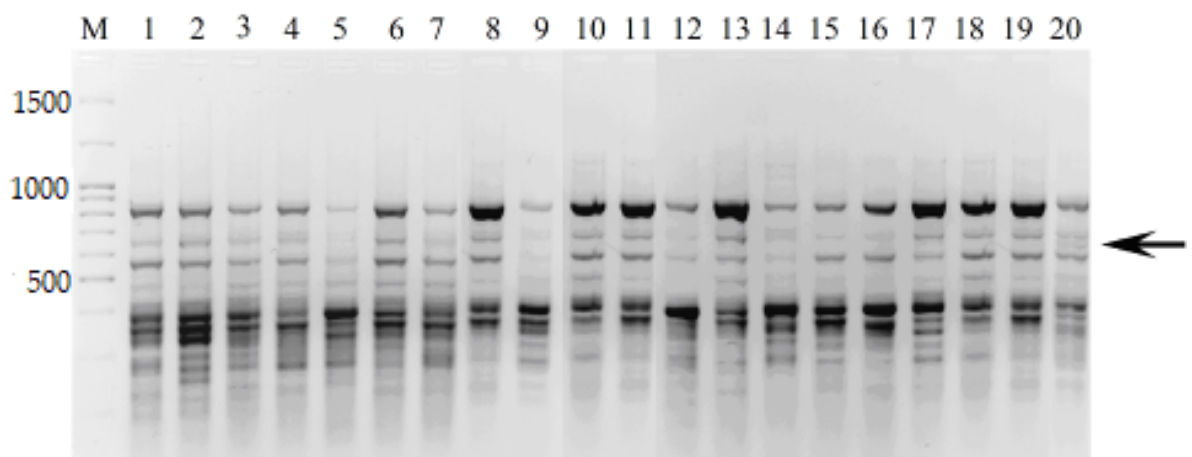

**Supplementary Figure S12.** The band profiles with ISSR primer X10 (AGC)<sub>6</sub>C for the samples of *L. sibirica* from the populations of Vishera Nature Reserve (*Ls\_Ih*). The numbers on the top indicate the sample numbers (1-20). Size marker (M): 100 bp DNA Ladder, marked on the left in bp (300 bp to 1500 bp).



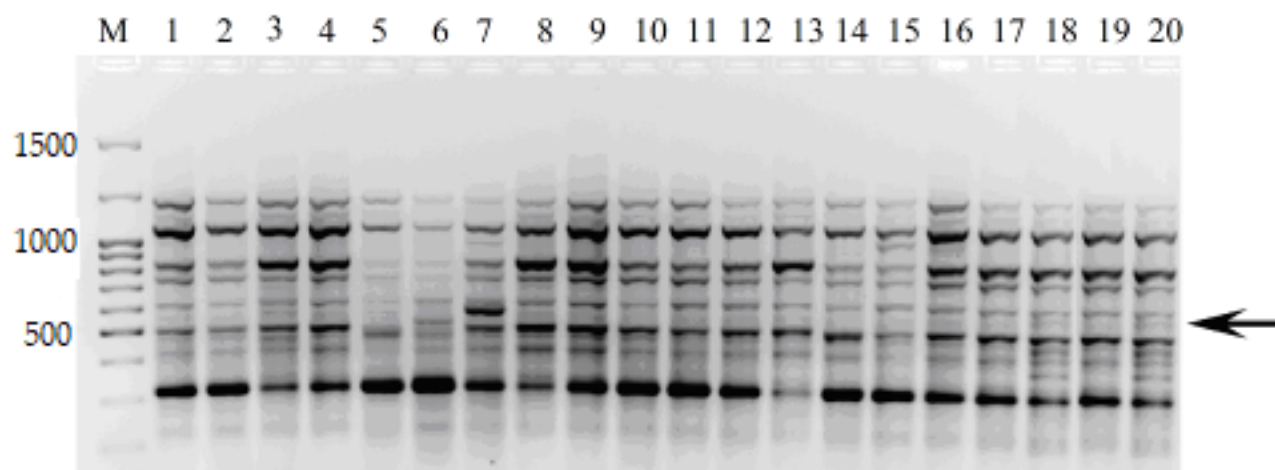

**Supplementary Figure S13.** The band profiles with ISSR primer X11 (AGC)6G for the samples of *L. sibirica* from the populations of Vishera Nature Reserve (*Ls\_Tl*). The numbers on the top indicate the sample numbers (1-20). Size marker (M): 100 bp DNA Ladder, marked on the left in bp (300 bp to 1500 bp).

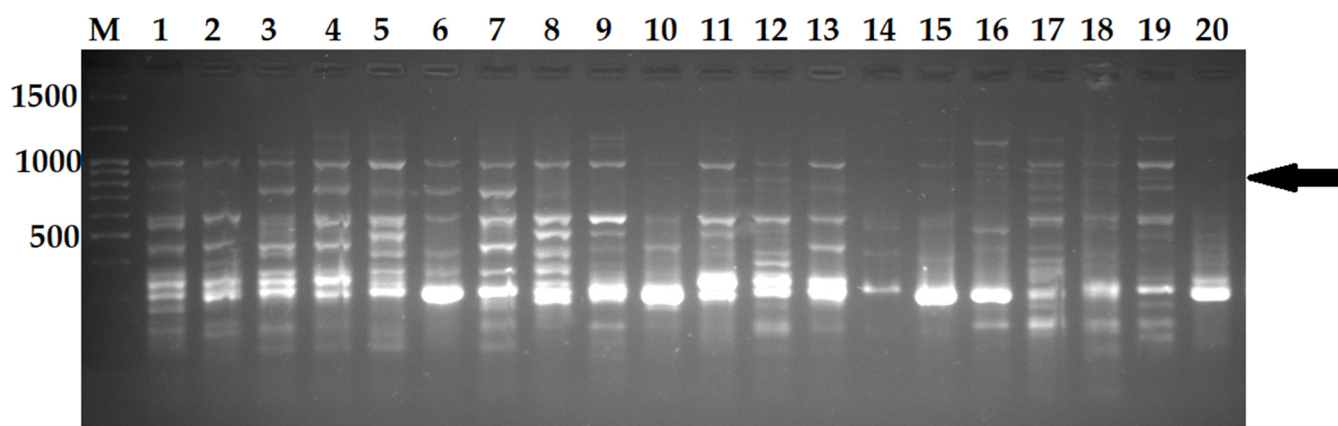

**Supplementary Figure S14.** The band profiles with ISSR primer X11 (AGC)6G for the samples of *L. sibirica* from the populations of Vishera Nature Reserve (*Ls\_Ih*). The numbers on the top indicate the sample numbers (1-20). Size marker (M): 100 bp DNA Ladder, marked on the left in bp (300 bp to 1500 bp).

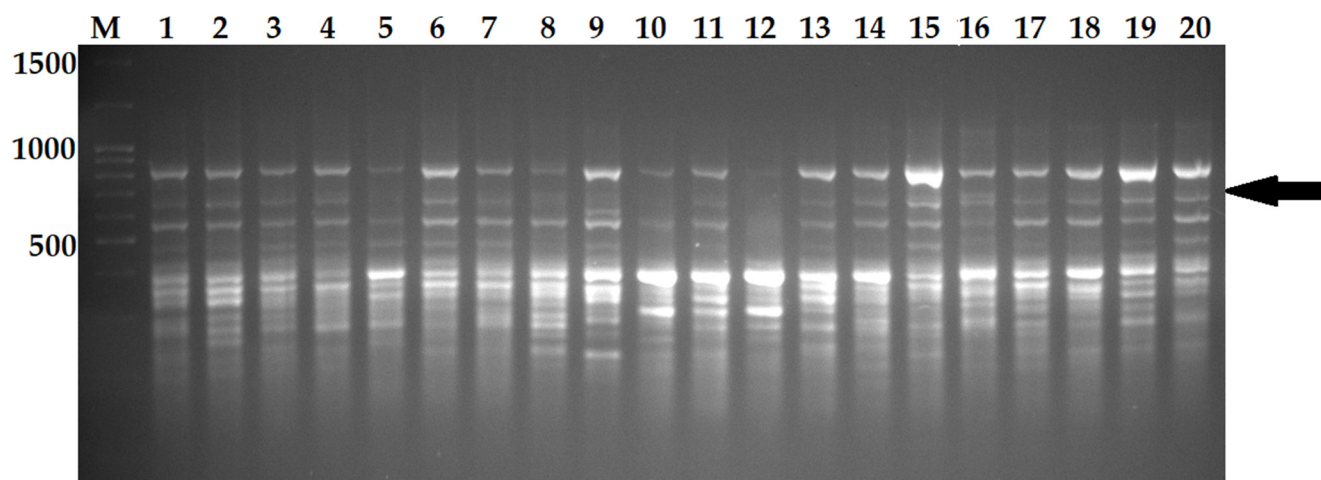

**Supplementary Figure S15.** The band profiles with ISSR primer X10 (AGC)6C for the samples of *L. sibirica* from the populations of Karpinsk's forestry (*Ls\_Kh*). The numbers on the top indicate the sample numbers (1-20). Size marker (M): 100 bp DNA Ladder, marked on the left in bp (300 bp to 1500 bp).

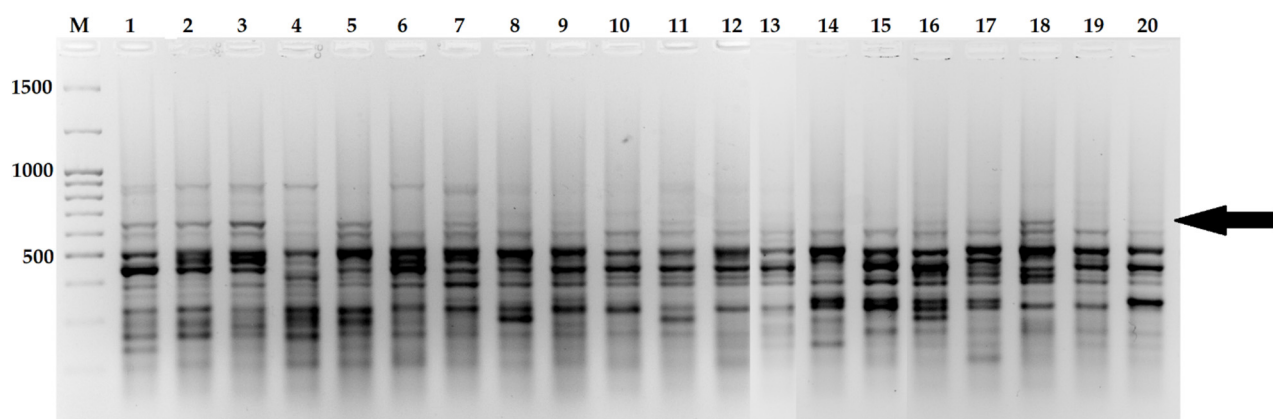

**Supplementary Figure S16.** The band profiles with ISSR primer M3 (AC)<sub>8</sub>CT for the samples of *L. sibirica* from the populations of Krasnovishersk's forestry (*Ls\_Kr*). The numbers on the top indicate the sample numbers (1-20). Size marker (M): 100 bp DNA Ladder, marked on the left in bp (300 bp to 1500 bp).

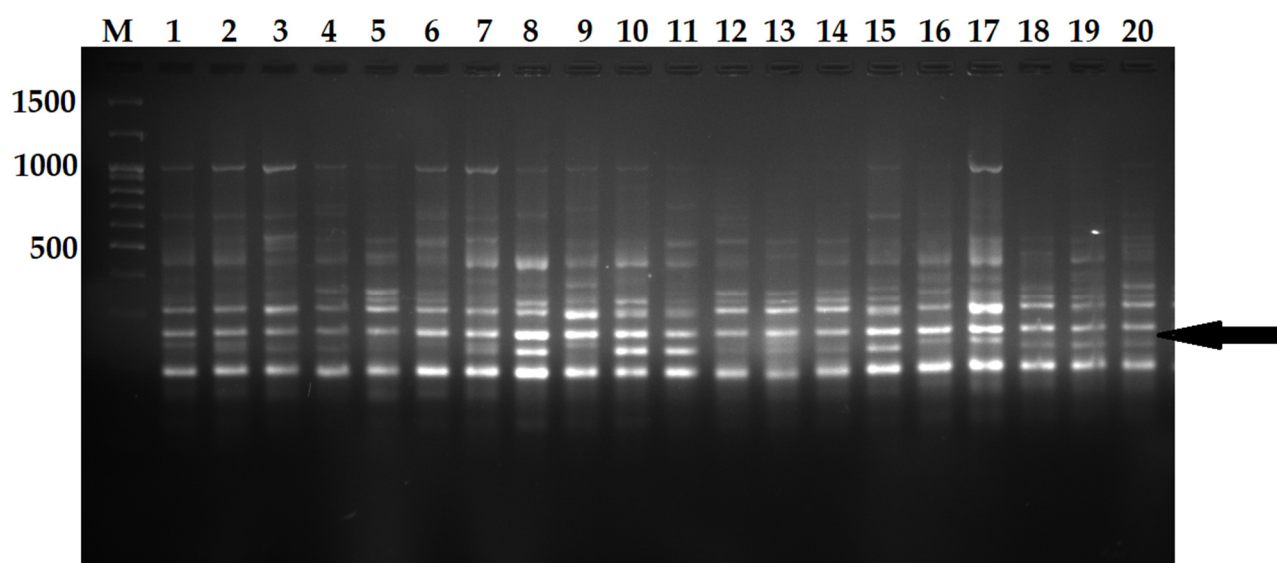

**Supplementary Figure S17.** The band profiles with ISSR primer CR-215 (CA)<sub>6</sub>GT for the samples of *L. sibirica* from the populations of Gainy's forestry (*Ls\_Gn*). The numbers on the top indicate the sample numbers (1-20). Size marker (M): 100 bp DNA Ladder, marked on the left in bp (300 bp to 1500 bp).

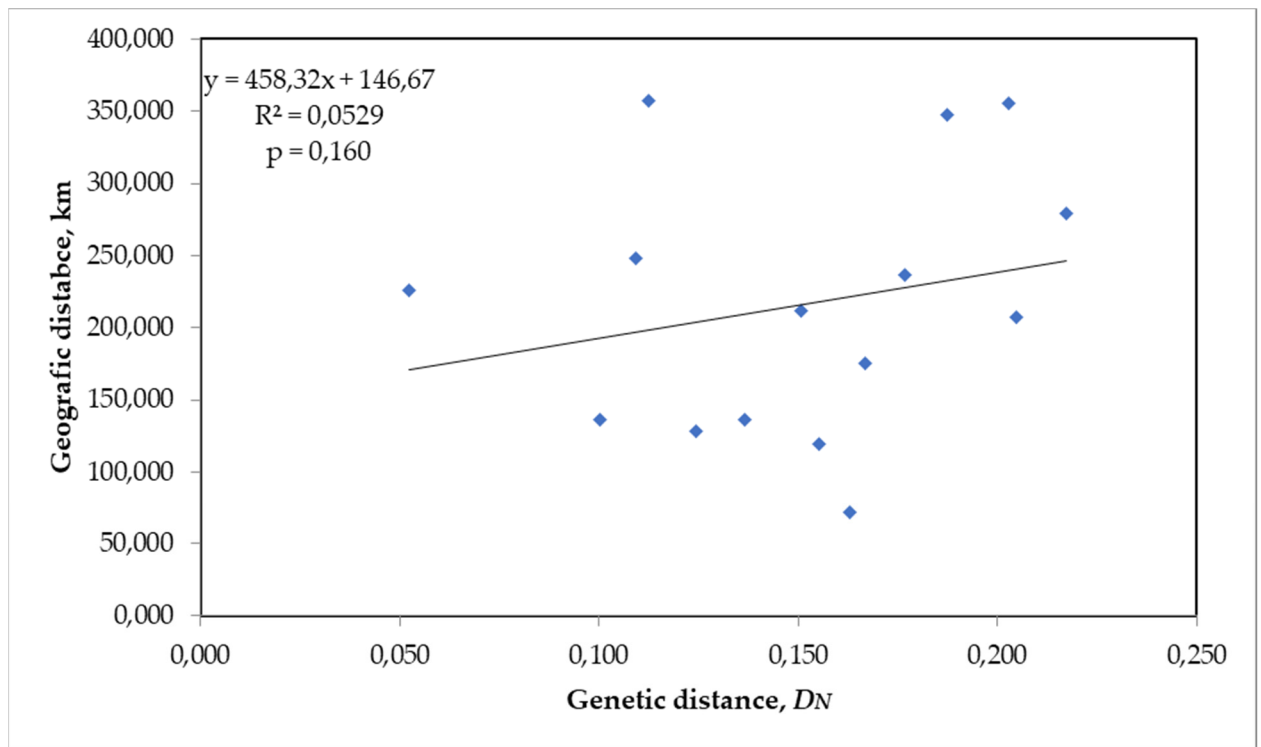

**Supplementary Figure S18.** Graph of dependence of genetic ( $D_N$ ) and geographical distances of *P. obovata* samples.

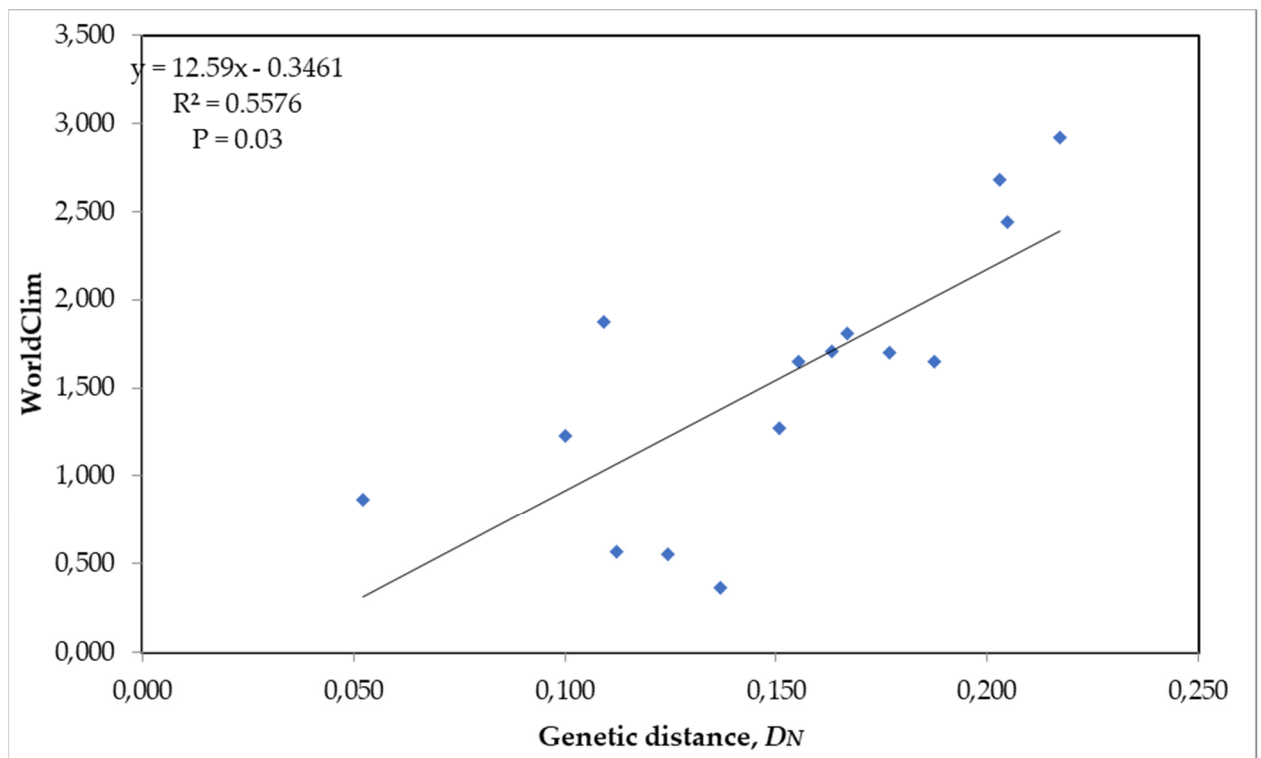

**Supplementary Figure S19.** Mantel test for the WorldClim data and genetic ( $D_N$ ) distance of *P. obovata* samples.

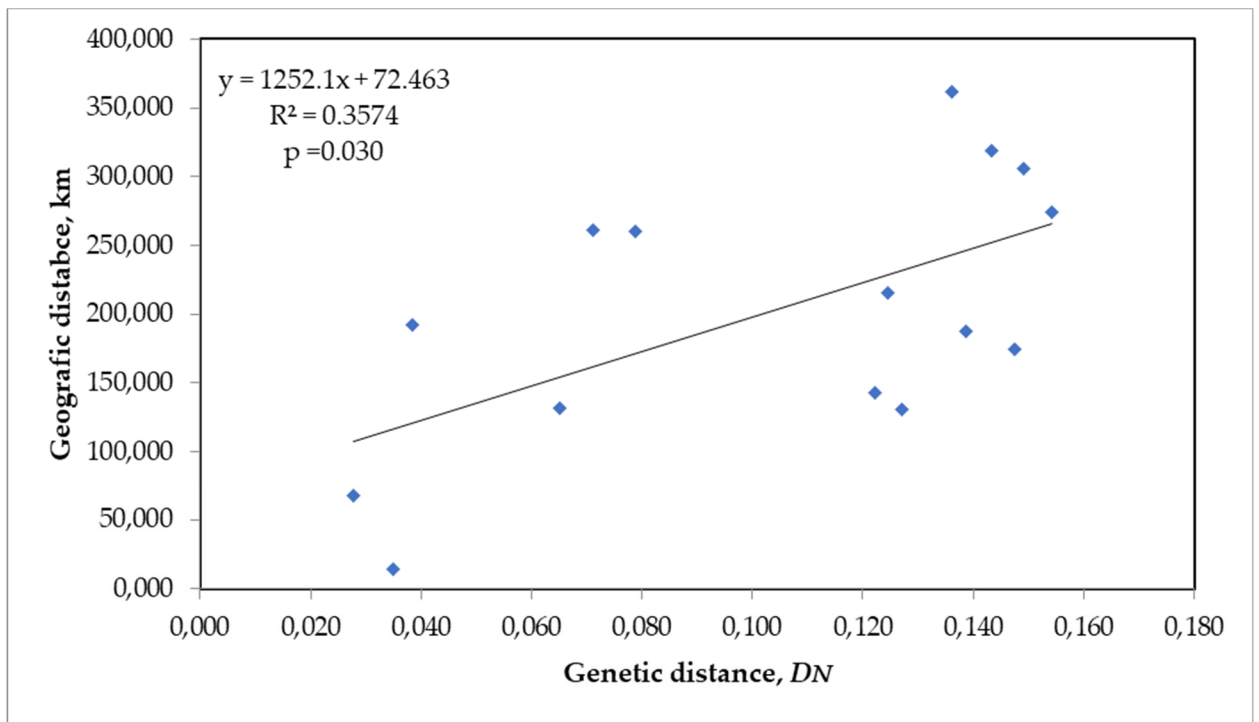

**Supplementary Figure S20.** Graph of dependence of genetic ( $D_N$ ) and geographical distances of *L. sibirica* samples.

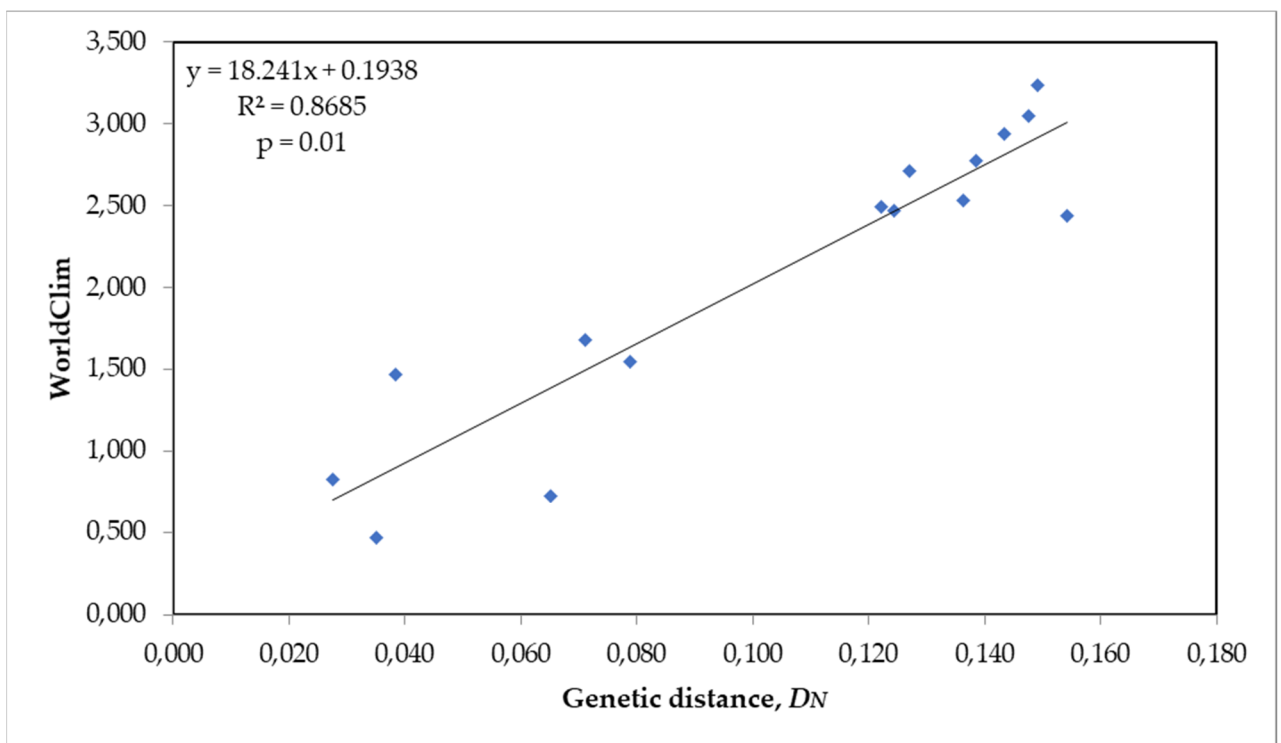

**Supplementary Figure S21.** Mantel test for the WorldClim data and genetic ( $D_N$ ) distance of *L. sibirica* samples.
